# Supplementary material for: Students’ Views towards Sars-Cov-2 Mass Asymptomatic Testing, Social Distancing and Self-Isolation in a University Setting during the COVID-19 Pandemic: A Qualitative Study
Source: MDPI journal article supplement (doi:10.3390/ijerph18084182), 2021-04-15
Supplement: s1 [file s1]

**Supplementary File 2.** Consolidated criteria for reporting qualitative studies (COREQ): 32-item checklist

| Topic and Item No.                             | Guide Questions/Description                                                                                                                              | Response                                                                                                                                                                                      |
|------------------------------------------------|----------------------------------------------------------------------------------------------------------------------------------------------------------|-----------------------------------------------------------------------------------------------------------------------------------------------------------------------------------------------|
| <b>Domain 1: Research team and reflexivity</b> |                                                                                                                                                          |                                                                                                                                                                                               |
| <i>Personal Characteristics</i>                |                                                                                                                                                          |                                                                                                                                                                                               |
| 1. Interviewer/facilitator                     | Which author/s conducted the focus groups?                                                                                                               | Holly Blake (HB) and Holly Knight (HK)                                                                                                                                                        |
| 2. Credentials                                 | What were the researcher's credentials? E.g. PhD, MD                                                                                                     | HB: PhD, CPsychol.<br>HK: PhD, CPsychol                                                                                                                                                       |
| 3. Occupation                                  | What was their occupation at the time of the study?                                                                                                      | HB: health psychologist/university academic;<br>HK: clinical psychology researcher                                                                                                            |
| 4. Gender                                      | Was the researcher male or female?                                                                                                                       | 2 female                                                                                                                                                                                      |
| 5. Experience and training                     | What experience or training did the researcher have?                                                                                                     | HB and HK: Senior mixed-methods researchers, experienced interviewer and focus group moderator, GCP trained                                                                                   |
| <i>Relationship with participants</i>          |                                                                                                                                                          |                                                                                                                                                                                               |
| 6. Relationship established                    | Was a relationship established prior to study commencement?                                                                                              | Researchers met the participants during recruitment                                                                                                                                           |
| 7. Participant knowledge of the interviewer    | What did the participants know about the researcher? e.g. personal goals, reasons for doing the research                                                 | Participants knew that HB was a university academic health researcher, and that HK was a health researcher. They knew that both interviewers were affiliated to the participating university. |
| 8. Interviewer characteristics                 | What characteristics were reported about the interviewer/facilitator? e.g. Bias, assumptions, reasons and interests in the research topic                | Participants knew that HB and HK were interested in the experiences of students during the COVID-19 pandemic.                                                                                 |
| <b>Domain 2: Study design</b>                  |                                                                                                                                                          |                                                                                                                                                                                               |
| <i>Theoretical framework</i>                   |                                                                                                                                                          |                                                                                                                                                                                               |
| 9. Methodological orientation and Theory       | What methodological orientation was stated to underpin the study? e.g. grounded theory, discourse analysis, ethnography, phenomenology, content analysis | Thematic analysis                                                                                                                                                                             |
| <i>Participant selection</i>                   |                                                                                                                                                          |                                                                                                                                                                                               |
| 10. Sampling                                   | How were participants selected? e.g. purposive, convenience, consecutive, snowball                                                                       | Purposive (e.g. gender, undergraduate or postgraduate, living circumstances (on/off campus), self-isolated or not, had a COVID-test or not)                                                   |

|                                        |                                                                                   |                                                                                                                                                     |
|----------------------------------------|-----------------------------------------------------------------------------------|-----------------------------------------------------------------------------------------------------------------------------------------------------|
| 11. Method of approach                 | How were participants approached? e.g. face-to-face, telephone, mail, email       | Participants were approached and recruited by email                                                                                                 |
| 12. Sample size                        | How many participants were in the study?                                          | 25 participants took part in qualitative focus groups                                                                                               |
| 13. Non-participation                  | How many people refused to participate or dropped out? Reasons?                   | 1 student signed up to a focus group but did not attend due to other commitments.                                                                   |
| <i>Setting</i>                         |                                                                                   |                                                                                                                                                     |
| 14. Setting of data collection         | Where was the data collected? e.g. home, clinic, workplace                        | Data were collected online (video-conferencing platform)                                                                                            |
| 15. Presence of non-participants       | Was anyone else present besides the participants and researchers?                 | No.                                                                                                                                                 |
| 16. Description of sample              | What are the important characteristics of the sample? e.g. demographic data, date | Students: self-isolated/not, COVID-tested/not, living circumstances (on/off campus).                                                                |
| <i>Data collection</i>                 |                                                                                   |                                                                                                                                                     |
| 17. Interview guide                    | Were questions, prompts, guides provided by the authors? Was it pilot tested?     | Questioning guide used for each focus group. Items were pilot tested with students in a patient and public involvement and engagement (PPIE) group. |
| 18. Repeat interviews                  | Were repeat interviews carried out? If yes, how many?                             | No. A total of 4 focus groups were conducted.                                                                                                       |
| 19. Audio/visual recording             | Did the research use audio or visual recording to collect the data?               | Focus groups were audio-recorded using a video-conferencing platform. Interviewers kept cameras on to assist with establishing rapport.             |
| 20. Field notes                        | Were field notes made during and/or after the interview or focus group?           | Yes.                                                                                                                                                |
| 21. Duration                           | What was the duration of the interviews or focus group?                           | Approx. 60-90 mins.                                                                                                                                 |
| 22. Data saturation                    | Was data saturation discussed?                                                    | Yes.                                                                                                                                                |
| 23. Transcripts returned               | Were transcripts returned to participants for comment and/or correction?          | No – due to time sensitivity of the research                                                                                                        |
| <b>Domain 3: analysis and findings</b> |                                                                                   |                                                                                                                                                     |
| <i>Data analysis</i>                   |                                                                                   |                                                                                                                                                     |
| 24. Number of data coders              | How many data coders coded the data?                                              | Two.                                                                                                                                                |
| 25. Description of the coding tree     | Did authors provide a description of the coding tree?                             | No, however initial coding was informed by the interview                                                                                            |

|                                  |                                                                                                                                   |                                                                                                                       |
|----------------------------------|-----------------------------------------------------------------------------------------------------------------------------------|-----------------------------------------------------------------------------------------------------------------------|
|                                  |                                                                                                                                   | guide, and coding was continuously refined.                                                                           |
| 26. Derivation of themes         | Were themes identified in advance or derived from the data?                                                                       | Themes were derived from the data.                                                                                    |
| 27. Software                     | What software, if applicable, was used to manage the data?                                                                        | No software was used; data was cut and pasted and grouped and colour coded in a word document and excel spread sheet. |
| 28. Participant checking         | Did participants provide feedback on the findings?                                                                                | Yes.                                                                                                                  |
| <i>Reporting</i>                 |                                                                                                                                   |                                                                                                                       |
| 29. Quotations presented         | Were participant quotations presented to illustrate the themes / findings? Was each quotation identified? e.g. participant number | Yes.                                                                                                                  |
| 30. Data and findings consistent | Was there consistency between the data presented and the findings?                                                                | Yes.                                                                                                                  |
| 31. Clarity of major themes      | Were major themes clearly presented in the findings?                                                                              | Yes.                                                                                                                  |
| 32. Clarity of minor themes      | Is there a description of diverse cases or discussion of minor themes?                                                            | Yes.                                                                                                                  |
