# Supplementary material for: Students’ Views towards Sars-Cov-2 Mass Asymptomatic Testing, Social Distancing and Self-Isolation in a University Setting during the COVID-19 Pandemic: A Qualitative Study
Source: MDPI journal article supplement (doi:10.3390/ijerph18084182), 2021-04-15

**Supplementary File 5.** Thematic map illustrating the relationships between the key themes and subthemes

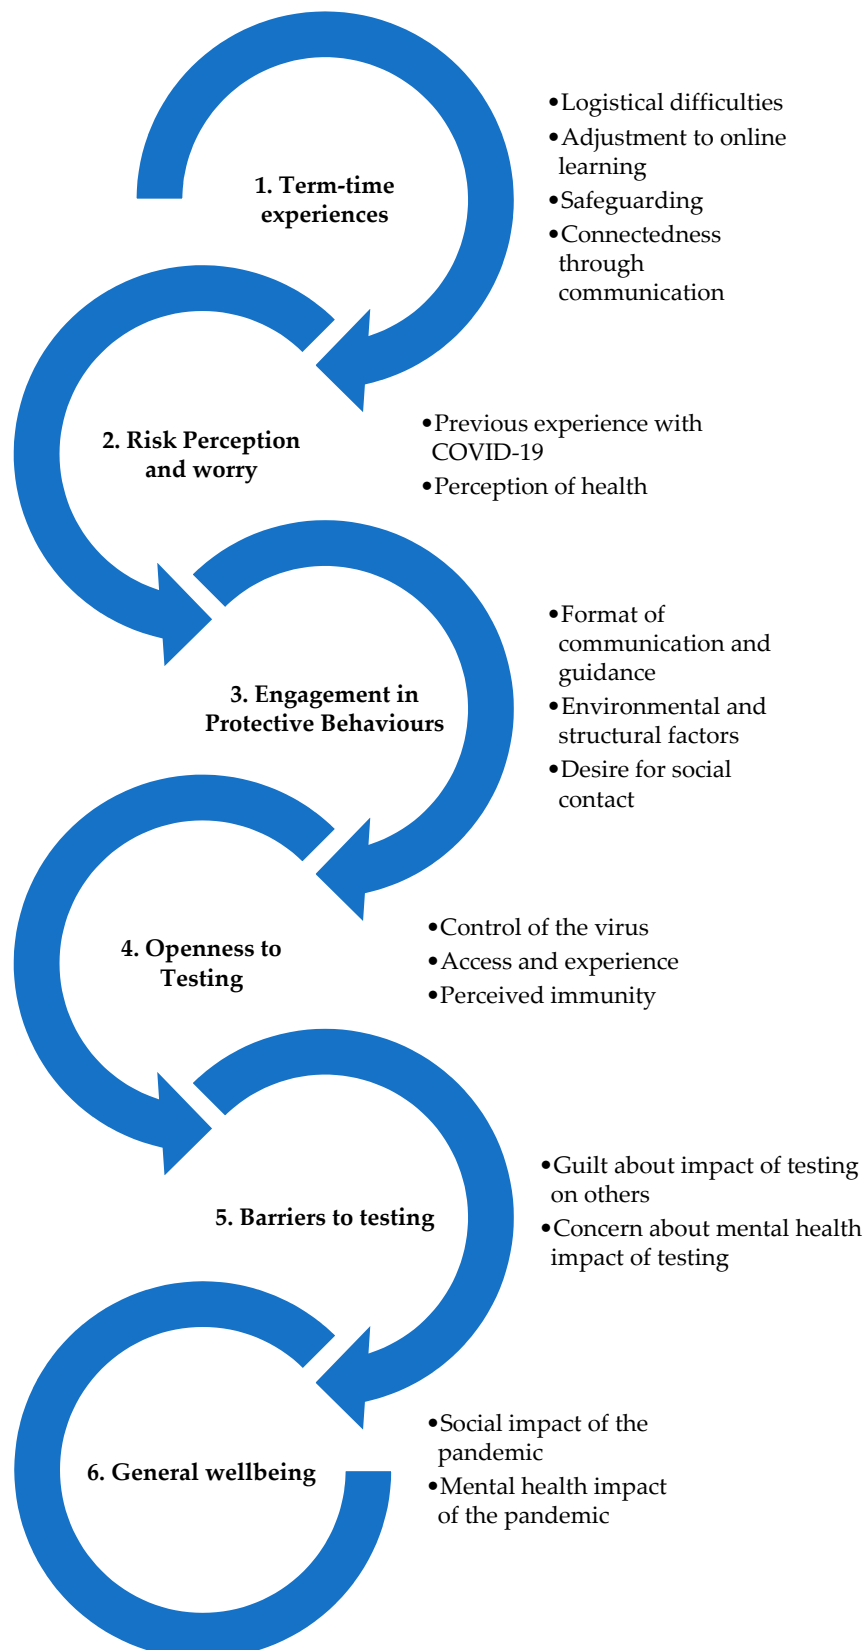

Supplement: s1 [file s1]
