# Supplementary material for: Students’ Views towards Sars-Cov-2 Mass Asymptomatic Testing, Social Distancing and Self-Isolation in a University Setting during the COVID-19 Pandemic: A Qualitative Study
Source: MDPI journal article supplement (doi:10.3390/ijerph18084182), 2021-04-15
Supplement: s1 [file s1]

### Supplementary File 3: Individual characteristics of participants

| ID (Participant) | Age | Gender | Home/Int†     | On/Off campus | Status <sup>a</sup> | Self-isolated <sup>b</sup><br>/Not |
|------------------|-----|--------|---------------|---------------|---------------------|------------------------------------|
| 1                | 22  | F      | International | Off campus    | Not tested          | Yes                                |
| 2                | 51  | F      | International | Off campus    | Not tested          | Yes                                |
| 3                | 20  | M      | Home          | Off campus    | Not tested          | No                                 |
| 4                | 25  | F      | Home          | Off campus    | Not tested          | No                                 |
| 5                | 25  | F      | Home          | On campus     | Not tested          | No                                 |
| 6                | 24  | F      | Home          | Off campus    | Sympt               | Yes                                |
| 7                | 32  | M      | International | Off campus    | Sympt               | Yes                                |
| 8                | 20  | M      | Home          | Off campus    | Sympt               | Yes                                |
| 9                | 20  | M      | Home          | Off campus    | Sympt               | Yes                                |
| 10               | 25  | F      | International | On campus     | Not tested          | No                                 |
| 11               | 22  | F      | International | Off campus    | Not tested          | Yes                                |
| 12               | 20  | F      | Home          | Off campus    | Not tested          | Yes                                |
| 13               | 32  | F      | Home          | Off campus    | Sympt               | Yes                                |
| 14               | 18  | M      | Home          | On campus     | Sympt               | Yes                                |
| 15               | 24  | F      | Home          | On campus     | Sympt               | Yes                                |
| 16               | 18  | F      | Home          | On campus     | Asympt              | Yes                                |
| 17               | 20  | F      | Home          | Off campus    | Sympt               | Yes                                |
| 18               | 20  | F      | Home          | Off campus    | Sympt               | Yes                                |
| 19               | 18  | M      | Home          | On campus     | Not tested          | No                                 |
| 20               | 18  | F      | Home          | Off campus    | Not tested          | Yes                                |
| 21               | 21  | M      | International | On campus     | Not tested          | Yes                                |
| 22               | 20  | F      | Home          | On campus     | Not tested          | No                                 |
| 23               | 22  | M      | Home          | Off campus    | Sympt               | No                                 |
| 24               | 20  | F      | Home          | Off campus    | Not tested          | Yes                                |
| 25               | 20  | M      | Home          | Off campus    | Sympt               | Yes                                |

Note: †International student; <sup>a</sup>Not tested for SARS-CoV-2, Tested Asympt. (University Asymptomatic Testing Service), Tested Sympt. (NHS Symptomatic Community Testing); <sup>b</sup>Self-isolated for any reason.
